# Supplementary material for: Consensus on Prioritisation of Actions for Reducing the Environmental Impact of a Large Tertiary Hospital: Application of the Nominal Group Technique
Source: MDPI journal article supplement (doi:10.3390/ijerph20053978), 2023-02-23
Supplement: s1 [file s1]

## Supplementary Materials

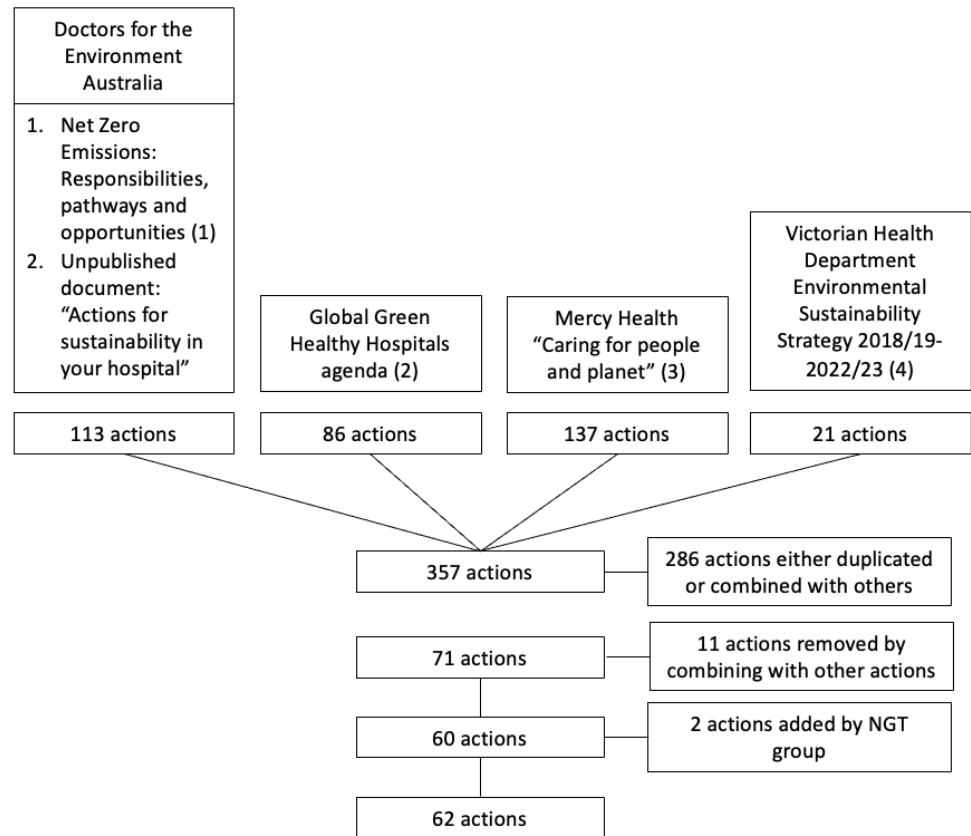

**Figure S1.** Process diagram for the development of the priority action list.

1. *Net Zero Carbon Emissions: Responsibilities, Pathways and Opportunities for Australia's Healthcare Sector*; Doctors for the Environment Australia: Carlton, Australia, 2020
2. *Global Green and Healthy Hospitals: A Comprehensive Environmental Health Agenda for Hospitals and Health Systems Around the World*; Healthcare Without Harm: Washington, DC, USA, 2011.
3. Mercy Health. *Caring for People and Planet: Mercy Health's Strategic Response to Laudato Si' 2020–25*; Mercy Health: Victoria, Australia, 2022.
4. Department of Health & Human Services. *Environmental Sustainability Strategy 2018–19 to 2022–23*; State Government of Victoria: Melbourne, Australia, 2022. Available online: <https://www.health.vic.gov.au/publications/environmental-sustainability-strategy-2018-19-to-2022-23> (accessed on 17 October 2018).

**Table S1.** All ranked potential actions staff at a tertiary Australian hospital could take to improve the environmental sustainability of the health service, means of each score and the combined ranking of each summed score for amenability to change and for climate impact.

| Final Rank | Proposed Priority Actions                                                                                                                                                          | Amenability to Change Summed Ratings (A) | Climate Impact Summed Ratings (B)        | Ranking Total Score (A × B) |
|------------|------------------------------------------------------------------------------------------------------------------------------------------------------------------------------------|------------------------------------------|------------------------------------------|-----------------------------|
|            |                                                                                                                                                                                    | [n=11, possible score range 11–33]       | [n=11, possible score range 11–33]       |                             |
|            |                                                                                                                                                                                    | Mean score (1–3) [High=3 Medium=2 Low=1] | Mean score (1–3) [High=3 Medium=2 Low=1] |                             |
| 1          | Engage hospital communications team to increase messaging around sustainability, promote local initiatives and broadcast any wins/successes in order to build momentum             | 32<br>3.0                                | 28<br>2.3                                | 896                         |
| 2          | Expand telehealth supports between Austin teams and referring health services to decrease the need for transfers and promote facilitation of care at regional/rural facilities     | 29<br>2.5                                | 29<br>2.7                                | 841                         |
| 3          | Include sustainability clauses in procurement contracts, encourage supplier 'take-back' programs for waste, a commitment from suppliers to achieve carbon neutrality               | 28<br>2.7                                | 29<br>2.5                                | 812                         |
| 4          | Reduce patient travel with improved technology to support telemedicine and appointment bundling                                                                                    | 27<br>2.7                                | 30<br>2.5                                | 810                         |
| 5          | Establish local area green groups led by local area green champions to coordinate initiatives across areas, share resources and educate                                            | 27<br>2.6                                | 30<br>2.4                                | 810                         |
| 5          | Commit to exclude fossil fuels (including natural gas) within planned capital upgrades by making capital upgrades electric only                                                    | 29<br>2.6                                | 27<br>2.6                                | 783                         |
| 6          | Establish education of the workforce on the health impacts of climate change and on low-carbon care pathways                                                                       | 26<br>2.8                                | 30<br>2.1                                | 780                         |
| 7          | Printing: double sided printing as standard on all printer settings, mandate paper sources to be ethically and sustainably sourced, work towards models of care that are paperless | 26<br>2.5                                | 30<br>2.4                                | 780                         |
| 7          | Lights off at night program: Reduce energy usage after hours including clinical areas with low night-time activity and offices                                                     | 31<br>2.8                                | 21<br>2.5                                | 775                         |
| 8          | Implement and prioritise reusable equipment in place of single-use equipment in operating theatres, ED, ICU and wards where possible                                               | 27<br>2.5                                | 28<br>2.4                                | 756                         |
| 9          | Reduce environmental hazards by auditing use of Hydrofluorocarbons (HFCs), Sulfa hexafluorides (SF6s) and explore the possibility to reduce, prevent wastage or replacement        | 26<br>2.5                                | 29<br>2.4                                | 754                         |
| 10         | Initiate energy power-downs of high-energy usage areas such as heating ventilation and cooling (HVAC) in theatres during times of reduced activity such as nights and weekends     | 29<br>2.3                                | 26<br>2.7                                | 754                         |
| 10         | Detect and remove leaks from nitrous oxide infrastructure (i.e. in theatres and emergency department)                                                                              | 25<br>2.7                                | 30<br>2.3                                | 750                         |
| 11         | Advocate for fossil-fuel free (all electric), zero emission and high-efficiency approaches to all new capital works                                                                | 30<br>2.5                                | 25<br>2.7                                | 750                         |
| 11         | Consider strategic sustainability research projects that will lead to financial and environmental savings for the hospital                                                         | 27<br>2.5                                | 27<br>2.5                                | 729                         |
| 12         | Coordinate a triple-bottom-line decision-making policy for introducing new single-use equipment, through liaison with infection control, procurement and stakeholders              | 27<br>2.3                                | 27<br>2.4                                | 729                         |
| 12         | Reduce energy use by installing motion-controlled lighting, occupancy sensors, LED lighting                                                                                        | 26<br>2.5                                | 28<br>2.4                                | 728                         |

|    |                                                                                                                                                                                                  |           |           |     |
|----|--------------------------------------------------------------------------------------------------------------------------------------------------------------------------------------------------|-----------|-----------|-----|
| 13 | Reduce single use disposable plastics in embedded retail                                                                                                                                         | 26<br>2.5 | 28<br>2.6 | 728 |
| 13 | Adopt a strategy to reduce/replace fossil fuel including natural gas use within existing buildings, and where they cannot be immediately replaced optimise their efficiency                      | 29<br>2.5 | 25<br>2.6 | 725 |
| 14 | Mandate that all bidding contractors have net zero approach to capital works                                                                                                                     | 30<br>2.2 | 24<br>2.5 | 720 |
| 15 | Adopt formal education strategies regarding environmental impact of clinical and occupational decisions. Include this in mandatory training.                                                     | 24<br>2.6 | 30<br>2.6 | 720 |
| 15 | Initiate sustainable pharmaceutical procurement for example, by preferencing companies with a net zero emissions target                                                                          | 27<br>2.2 | 25<br>2.1 | 675 |
| 16 | Dedicate education to recycling, establish mechanisms to feedback recycling and waste management activities (i.e. contamination rates) and update recycling educational resources                | 24<br>2.5 | 28<br>2.3 | 672 |
| 17 | Negotiate smaller/less packaging with purchase of consumables                                                                                                                                    | 28<br>2.5 | 24<br>2.5 | 672 |
|    | Embed sustainability into research plans and funding such as requiring environmental assessments in new research approvals and fostering research and innovation through dedicated grant funding | 25<br>2.6 | 29<br>2.1 | 667 |
| 17 | Audit and reduce clinical waste production to <15% of total waste, institute education and behaviour change interventions to reduce clinical waste usage                                         | 26<br>2.4 | 25<br>2.3 | 650 |
| 18 | Initiate policy to request companies to provide environmental (life-cycle) assessment before purchasing decisions are made                                                                       | 26<br>2.2 | 25<br>2.5 | 650 |
|    | Implement reusable PPE across all sites                                                                                                                                                          | 26<br>2.3 | 25<br>2.5 | 650 |
| 19 | Source hospital and embedded retail foods from local and sustainable food sources                                                                                                                | 26<br>2.0 | 25<br>2.2 | 650 |
| 19 | Utilise electric vehicles for inter-facility shuttle transport                                                                                                                                   | 24<br>2.6 | 27<br>2.5 | 648 |
| 20 | Commit to no piped nitrous oxide in future building or capital works upgrades                                                                                                                    | 25<br>2.5 | 25<br>2.3 | 625 |
|    | Support Choosing Wisely to identify and eliminate low-value clinical care                                                                                                                        | 23<br>2.6 | 27<br>2.0 | 621 |
| 21 | Linen services: ensure adequate supply to avoid single-use plastics, assess environmental impact of services and reduce inefficiencies                                                           | 23<br>2.5 | 27<br>2.3 | 621 |
| 22 | Replace fleet vehicles with electric vehicles                                                                                                                                                    | 28<br>2.3 | 22<br>2.5 | 616 |
|    | Initiate organic composting waste streams to manage hospital and embedded retail food waste                                                                                                      | 25<br>2.0 | 24<br>2.2 | 600 |
| 23 | Pathology: engage with choosing wisely to reduce unnecessary testing, improve efficiencies, power-down during low-activity                                                                       | 25<br>2.4 | 24<br>2.4 | 600 |
|    | Promote responsible prescribing: low-carbon prescribing education and audit impacts                                                                                                              | 25<br>2.2 | 24<br>2.3 | 600 |
| 24 | Audit pharmaceutical waste management systems and implement improvements to reduce environmental contamination                                                                                   | 23<br>2.3 | 26<br>2.3 | 598 |
|    | Provide EV charging sites in car parking areas                                                                                                                                                   | 22<br>2.4 | 27<br>2.1 | 594 |
| 25 | Expand single-stream recycling activities in critical care areas such as metal recycling, soft plastics recycling, PVC recycling, kinguard (surgical wrap)                                       | 22<br>2.5 | 27<br>1.9 | 594 |

|    |                                                                                                                                                                                                                             |           |           |     |
|----|-----------------------------------------------------------------------------------------------------------------------------------------------------------------------------------------------------------------------------|-----------|-----------|-----|
| 26 | Remove environmentally harmful pharmaceuticals from formulary, where possible                                                                                                                                               | 23<br>2.1 | 25<br>2.5 | 575 |
| 27 | Install solar photovoltaic panels on Austin health buildings                                                                                                                                                                | 27<br>2.1 | 21<br>2.5 | 567 |
| 28 | Publicise opportunities for waste to be repurposed when it will otherwise be discarded. For example collecting cardboard boxes for personal use (moving house), reusing batteries used once in disposable theatre equipment | 21<br>2.4 | 26<br>1.8 | 546 |
| 29 | Work with Indigenous partners to ensure practices are safe and inclusive                                                                                                                                                    | 20<br>2.2 | 27<br>1.7 | 540 |
| 30 | Aim for minimum 5% of renewable energy purchasing until 2025 (when renewable electricity will be supplied by Victorian Government)                                                                                          | 26<br>2.0 | 20<br>2.5 | 520 |
| 31 | Minimise waste transport: Assess waste providers and consider provider that has best environmental practices                                                                                                                | 23<br>1.8 | 22<br>2.1 | 506 |
| 32 | Develop initiatives that promote oral medications in place of IV, where clinically suitable                                                                                                                                 | 21<br>2.2 | 24<br>2.0 | 504 |
| 33 | Incentivise and promote cycling to work by upgrading facilities                                                                                                                                                             | 20<br>2.4 | 25<br>1.9 | 500 |
| 34 | Install hot water heat pumps (electric) to replace gas boilers                                                                                                                                                              | 27<br>1.9 | 18<br>2.5 | 486 |
|    | Upgrade building insulation to improve building energy efficiency                                                                                                                                                           | 27<br>1.8 | 18<br>2.6 | 486 |
| 35 | Work with community liaison / consumer engagement to explore partnering with consumers in low carbon care                                                                                                                   | 22<br>1.7 | 22<br>2.0 | 484 |
| 36 | Reduce water waste with low-flow taps, low-flush toilets etc.                                                                                                                                                               | 20<br>2.3 | 24<br>2.0 | 480 |
| 37 | Prioritise the development of green spaces within the organisation, highlighting the link between health and access to nature as well as promoting staff wellbeing, recruitment and retention                               | 19<br>2.0 | 25<br>1.5 | 475 |
| 38 | Explore opportunities to use patient transfer providers with electric vehicles/hybrid vehicles                                                                                                                              | 21<br>2.0 | 22<br>1.8 | 462 |
|    | Invest in sustainable and low-carbon financial investments                                                                                                                                                                  | 22<br>1.8 | 21<br>1.8 | 462 |
| 39 | Audit energy purchases for privately leased buildings and source from renewable energy                                                                                                                                      | 21<br>2.0 | 20<br>1.9 | 420 |
| 40 | Include rainwater capture and use in new capital works, and explore ability to retrofit to existing infrastructure                                                                                                          | 19<br>2.1 | 22<br>1.9 | 418 |
| 41 | Allow E-bike purchases to be salary packaged                                                                                                                                                                                | 16<br>2.2 | 26<br>1.5 | 416 |
| 42 | Introduce strategies to reduce business air travel                                                                                                                                                                          | 16<br>1.0 | 23<br>1.5 | 368 |
| 43 | Start or expand grey water recycling (i.e. laundry water and dialysis water recycling)                                                                                                                                      | 17<br>1.5 | 17<br>1.9 | 289 |
| 44 | Promote public transport by working with local governments to improve timings of services, routes and access to stops/stations                                                                                              | 19<br>1.5 | 15<br>1.8 | 285 |
